# Supplementary material for: Flavonoid Profiles and Antioxidant Potential of Monochoria angustifolia (G. X. Wang) Boonkerd & Tungmunnithum, a New Species from the Genus Monochoria C. Presl
Source: MDPI journal article supplement (doi:10.3390/antiox11050952), 2022-05-12
Supplement: s1 [file s1]

# Flavonoid Profiles and Antioxidant Potential of *Monochoria angustifolia* (G. X. Wang) Boonkerd & Tungmunthum, a New Species from the Genus *Monochoria* C. Presl

Duangjai Tungmunthum <sup>1,2,3,\*</sup>, Samantha Drouet <sup>2</sup>, Laurine Garros <sup>2</sup>, Jose Manuel Lorenzo <sup>4,5</sup>, and Christophe Hano <sup>2,3,\*</sup>

- <sup>1</sup> Department of Pharmaceutical Botany, Faculty of Pharmacy, Mahidol University, Bangkok 10400, Thailand; duangjai.tun@mahidol.ac.th (D.T.)
- <sup>2</sup> Laboratoire de Biologie des Ligneux et des Grandes Cultures, INRAE USC1328, Campus Eure et Loir, Orleans University, 28000 Chartres, France; duangjai.tun@mahidol.ac.th (D.T.) ; samantha.drouet@univ-orleans.fr (S.D.); laurine.garros@univ-orleans.fr (L.G.); hano@univ-orleans.fr (C.H.)
- <sup>3</sup> Le Studium Institute for Advanced Studies, 1 Rue Dupanloup, 45000 Orléans, France; duangjai.tun@mahidol.ac.th (D.T.) ; hano@univ-orleans.fr (C.H.)
- <sup>4</sup> Centro Tecnológico de la Carne de Galicia, Adva. Galicia n\_ 4, Parque Tecnológico de Galicia, San Cibrao das Viñas, 32900 Ourense, Spain; jmlorenzo@ceteca.net (J.M.L.)
- <sup>5</sup> Área de Tecnología de los Alimentos, Facultad de Ciencias de Ourense, Universidad de Vigo, 32004 Ourense, Spain
- \* Correspondence: duangjai.tun@mahidol.ac.th (D.T.) ; hano@univ-orleans.fr (C.H.)

**Table S1.** HPLC quantification (expressed in mg/100g DW) of the main flavonoids in different populations of two *Monochoria* species (6 populations of *M. hastata* and 25 populations of *M. angustifolia*) covering the entire floristic regions from Thailand.

|                             |    | (1)   |      | (2)  |      | (3)   |      | (4)   |      | (5)  |      |
|-----------------------------|----|-------|------|------|------|-------|------|-------|------|------|------|
| Species & population number |    | mean  | SD   | mean | SD   | mean  | SD   | mean  | SD   | mean | SD   |
| <i>M. hastata</i>           | 1  | 24.58 | 1.14 | 4.21 | 0.35 | 10.74 | 0.24 | 6.38  | 0.84 | 2.27 | 0.66 |
|                             | 2  | 28.15 | 2.90 | 4.94 | 0.13 | 12.29 | 0.06 | 7.28  | 0.21 | 2.60 | 0.17 |
|                             | 3  | 25.71 | 0.05 | 4.4  | 0.72 | 11.23 | 0.11 | 6.78  | 0.40 | 2.37 | 0.00 |
|                             | 4  | 25.96 | 0.75 | 4.32 | 2.99 | 11.34 | 1.55 | 6.63  | 0.54 | 2.40 | 0.04 |
|                             | 5  | 23.44 | 0.21 | 3.94 | 0.04 | 10.24 | 0.43 | 6.15  | 0.15 | 2.16 | 0.01 |
|                             | 6  | 19.78 | 1.12 | 3.43 | 0.17 | 9.63  | 0.26 | 5.77  | 0.92 | 1.83 | 0.06 |
| <i>M. angustifolia</i>      | 1  | 8.40  | 0.20 | 7.23 | 0.12 | 14.03 | 1.60 | 9.52  | 0.64 | 1.30 | 0.02 |
|                             | 2  | 8.78  | 0.03 | 7.45 | 0.15 | 14.67 | 0.24 | 9.92  | 0.95 | 1.36 | 0.00 |
|                             | 3  | 6.94  | 0.12 | 5.91 | 0.36 | 11.59 | 0.94 | 7.86  | 0.38 | 1.07 | 0.01 |
|                             | 4  | 8.46  | 0.48 | 7.14 | 0.26 | 14.14 | 0.38 | 9.62  | 1.54 | 1.31 | 0.05 |
|                             | 5  | 10.71 | 0.73 | 9.28 | 1.38 | 17.89 | 0.58 | 12.14 | 2.35 | 1.65 | 0.07 |
|                             | 6  | 10.05 | 0.21 | 8.67 | 0.40 | 16.80 | 1.68 | 11.47 | 0.68 | 1.55 | 0.02 |
|                             | 7  | 10.41 | 0.13 | 8.91 | 0.90 | 17.41 | 1.03 | 11.81 | 0.41 | 1.61 | 0.01 |
|                             | 8  | 6.97  | 0.36 | 5.62 | 0.12 | 11.64 | 0.29 | 7.95  | 1.16 | 1.08 | 0.03 |
|                             | 9  | 8.60  | 1.11 | 7.34 | 0.21 | 14.38 | 2.62 | 9.76  | 0.78 | 1.33 | 0.01 |
|                             | 10 | 11.18 | 0.32 | 9.52 | 0.83 | 18.68 | 0.76 | 12.67 | 0.23 | 1.73 | 0.00 |
|                             | 11 | 9.27  | 0.05 | 7.67 | 0.43 | 15.50 | 0.13 | 10.56 | 0.39 | 1.43 | 0.04 |

|  |    |       |      |       |      |       |      |       |      |      |      |
|--|----|-------|------|-------|------|-------|------|-------|------|------|------|
|  | 12 | 7.92  | 0.63 | 6.71  | 1.58 | 13.23 | 1.49 | 8.94  | 0.44 | 1.22 | 0.01 |
|  | 13 | 11.44 | 0.28 | 9.98  | 0.33 | 19.12 | 0.67 | 12.98 | 0.20 | 1.77 | 0.10 |
|  | 14 | 11.28 | 0.18 | 9.45  | 0.16 | 18.85 | 0.42 | 12.79 | 0.13 | 1.74 | 0.06 |
|  | 15 | 9.91  | 0.66 | 8.56  | 0.48 | 16.57 | 1.56 | 11.23 | 0.46 | 1.53 | 0.15 |
|  | 16 | 22.04 | 0.02 | 18.91 | 0.13 | 36.84 | 0.49 | 25.09 | 0.15 | 3.41 | 0.20 |
|  | 17 | 16.33 | 0.76 | 14.11 | 0.29 | 27.30 | 1.81 | 18.53 | 0.54 | 2.52 | 0.62 |
|  | 18 | 16.25 | 0.25 | 13.88 | 0.17 | 27.16 | 0.60 | 18.38 | 0.18 | 2.51 | 0.46 |
|  | 19 | 16.61 | 0.31 | 14.29 | 0.72 | 27.76 | 0.75 | 18.74 | 0.22 | 2.57 | 0.10 |
|  | 20 | 8.96  | 0.52 | 7.55  | 0.25 | 14.98 | 1.23 | 10.11 | 0.37 | 1.39 | 0.00 |
|  | 21 | 13.60 | 0.47 | 11.54 | 1.15 | 22.73 | 1.11 | 15.23 | 0.33 | 2.10 | 0.02 |
|  | 22 | 13.91 | 0.20 | 11.67 | 0.69 | 23.24 | 0.47 | 15.97 | 0.14 | 2.15 | 0.01 |
|  | 23 | 15.10 | 2.03 | 12.97 | 0.32 | 25.24 | 0.74 | 17.33 | 0.62 | 2.33 | 0.16 |
|  | 24 | 11.71 | 0.35 | 10.01 | 1.83 | 19.57 | 0.19 | 13.22 | 0.20 | 1.81 | 0.00 |
|  | 25 | 14.74 | 0.09 | 12.55 | 5.08 | 24.64 | 4.39 | 16.72 | 7.63 | 2.28 | 0.11 |

1. apigenin-7-*O*-rutinoside, 2. luteolin-7-*O*-glucoside, 3. apigenin-7-*O*-glucoside (aka apigetrin), 4. luteolin, 5. apigenin.

**Table S2.** *In vitro* cell-free antioxidant (FRAP, CUPRAC, ABTS, DPPH and ORAC) and cellular antioxidant (CAA) assays of extracts from 25 different populations of *M. angustifolia* and 6 different populations of *M. hastata*.

| <i>Species - Population</i> |     | FRAP<br>( $\mu\text{mol TEAC}$ )  | CUPRAC<br>( $\mu\text{mol TEAC}$ ) | ABTS<br>( $\mu\text{mol TEAC}$ )     | DPPH<br>( $\mu\text{mol TEAC}$ )  | ORAC<br>( $\mu\text{mol TEAC}$ )  | CAA<br>(% RO/NS inhibiion)       |
|-----------------------------|-----|-----------------------------------|------------------------------------|--------------------------------------|-----------------------------------|-----------------------------------|----------------------------------|
| <i>M. hastata</i>           | #1  | 168.82 $\pm$ 45.95 <sup>fg</sup>  | 126.98 $\pm$ 16.56 <sup>cd</sup>   | 189.42 $\pm$ 2.79 <sup>bc</sup>      | 359.52 $\pm$ 7.80 <sup>a</sup>    | 296.15 $\pm$ 20.66 <sup>cd</sup>  | 47.15 $\pm$ 1.56 <sup>d</sup>    |
|                             | #2  | 209.72 $\pm$ 8.20 <sup>f</sup>    | 149.83 $\pm$ 6.07 <sup>c</sup>     | 192.34 $\pm$ 0.58 <sup>bc</sup>      | 347.14 $\pm$ 7.56 <sup>a</sup>    | 325.84 $\pm$ 4.67 <sup>c</sup>    | 51.29 $\pm$ 2.51 <sup>cd</sup>   |
|                             | #3  | 187.00 $\pm$ 15.52 <sup>fg</sup>  | 122.11 $\pm$ 13.13 <sup>d</sup>    | 187.66 $\pm$ 2.92 <sup>bc</sup>      | 352.86 $\pm$ 3.30 <sup>a</sup>    | 293.36 $\pm$ 14.72 <sup>cd</sup>  | 48.39 $\pm$ 2.56 <sup>cd</sup>   |
|                             | #4  | 192.92 $\pm$ 11.34 <sup>fg</sup>  | 113.87 $\pm$ 12.46 <sup>e</sup>    | 187.95 $\pm$ 1.17 <sup>c</sup>       | 349.05 $\pm$ 2.52 <sup>a</sup>    | 288.28 $\pm$ 13.32 <sup>cd</sup>  | 48.07 $\pm$ 3.96 <sup>cd</sup>   |
|                             | #5  | 172.53 $\pm$ 15.21 <sup>g</sup>   | 126.61 $\pm$ 15.10 <sup>cd</sup>   | 187.95 $\pm$ 3.09 <sup>bc</sup>      | 352.86 $\pm$ 5.95 <sup>a</sup>    | 297.58 $\pm$ 13.27 <sup>cd</sup>  | 42.36 $\pm$ 5.12 <sup>d</sup>    |
|                             | #6  | 143.75 $\pm$ 8.98 <sup>g</sup>    | 123.72 $\pm$ 10.24 <sup>cd</sup>   | 189.12 $\pm$ 2.03 <sup>bc</sup>      | 353.81 $\pm$ 1.90 <sup>a</sup>    | 295.67 $\pm$ 10.62 <sup>cd</sup>  | 52.82 $\pm$ 3.41 <sup>cd</sup>   |
| <i>M. angustifolia</i>      | #1  | 213.03 $\pm$ 16.31 <sup>f</sup>   | 89.19 $\pm$ 10.48 <sup>ef</sup>    | 100.82 $\pm$ 9.93 <sup>fg</sup>      | 310.95 $\pm$ 8.14 <sup>de</sup>   | 192.57 $\pm$ 17.59 <sup>f</sup>   | 51.81 $\pm$ 8.52 <sup>bcd</sup>  |
|                             | #2  | 226.12 $\pm$ 29.34 <sup>ef</sup>  | 83.91 $\pm$ 22.43 <sup>e</sup>     | 141.75 $\pm$ 11.50 <sup>ef</sup>     | 332.86 $\pm$ 1.65 <sup>b</sup>    | 222.60 $\pm$ 31.57 <sup>f</sup>   | 48.96 $\pm$ 3.63 <sup>cd</sup>   |
|                             | #3  | 175.70 $\pm$ 21.87 <sup>g</sup>   | 57.24 $\pm$ 11.74 <sup>g</sup>     | 46.43 $\pm$ 7.71 <sup>fg</sup>       | 330.95 $\pm$ 6.67 <sup>bc</sup>   | 113.07 $\pm$ 18.13 <sup>g</sup>   | 46.28 $\pm$ 1.95 <sup>cd</sup>   |
|                             | #4  | 217.30 $\pm$ 16.89 <sup>f</sup>   | 82.64 $\pm$ 16.47 <sup>ef</sup>    | 80.94 $\pm$ 5.60 <sup>fg</sup>       | 326.19 $\pm$ 5.04 <sup>bc</sup>   | 160.29 $\pm$ 41.51 <sup>fg</sup>  | 52.06 $\pm$ 10.21 <sup>bcd</sup> |
|                             | #5  | 287.69 $\pm$ 30.07 <sup>de</sup>  | 107.51 $\pm$ 18.51 <sup>e</sup>    | 165.44 $\pm$ 26.03 <sup>bc</sup>     | 278.57 $\pm$ 7.56 <sup>f</sup>    | 228.97 $\pm$ 23.41 <sup>f</sup>   | 60.56 $\pm$ 7.32 <sup>bc</sup>   |
|                             | #6  | 260.55 $\pm$ 14.66 <sup>de</sup>  | 110.65 $\pm$ 7.09 <sup>e</sup>     | 171.58 $\pm$ 9.96 <sup>cd</sup>      | 307.14 $\pm$ 14.29 <sup>de</sup>  | 260.81 $\pm$ 17.81 <sup>de</sup>  | 48.07 $\pm$ 5.62 <sup>cd</sup>   |
|                             | #7  | 270.06 $\pm$ 18.95 <sup>de</sup>  | 112.45 $\pm$ 16.00 <sup>ef</sup>   | 162.81 $\pm$ 12.42 <sup>cd</sup>     | 297.62 $\pm$ 13.33 <sup>ef</sup>  | 258.30 $\pm$ 3.79 <sup>ef</sup>   | 59.45 $\pm$ 7.33 <sup>bc</sup>   |
|                             | #8  | 173.22 $\pm$ 15.64 <sup>g</sup>   | 79.08 $\pm$ 10.78 <sup>f</sup>     | 68.65 $\pm$ 5.15 <sup>fg</sup>       | 315.71 $\pm$ 7.56 <sup>d</sup>    | 157.94 $\pm$ 15.44 <sup>fg</sup>  | 46.02 $\pm$ 9.91 <sup>cd</sup>   |
|                             | #9  | 221.16 $\pm$ 19.06 <sup>f</sup>   | 89.38 $\pm$ 12.15 <sup>ef</sup>    | 170.99 $\pm$ 11.70 <sup>bc</sup>     | 298.57 $\pm$ 14.38 <sup>e</sup>   | 246.64 $\pm$ 10.25 <sup>e</sup>   | 52.59 $\pm$ 7.74 <sup>bcd</sup>  |
|                             | #10 | 291.82 $\pm$ 33.68 <sup>de</sup>  | 114.32 $\pm$ 10.54 <sup>ef</sup>   | 155.20 $\pm$ 9.40 <sup>bc</sup>      | 318.57 $\pm$ 3.30 <sup>d</sup>    | 237.99 $\pm$ 29.02 <sup>e</sup>   | 52.34 $\pm$ 4.52 <sup>bcd</sup>  |
|                             | #11 | 238.10 $\pm$ 14.61 <sup>ef</sup>  | 108.22 $\pm$ 8.97 <sup>ef</sup>    | 129.18 $\pm$ 38.89 <sup>bcdefg</sup> | 325.24 $\pm$ 2.52 <sup>c</sup>    | 234.10 $\pm$ 49.00 <sup>def</sup> | 55.14 $\pm$ 6.24 <sup>bc</sup>   |
|                             | #12 | 194.99 $\pm$ 18.26 <sup>fg</sup>  | 103.65 $\pm$ 12.37 <sup>ef</sup>   | 170.99 $\pm$ 14.18 <sup>bc</sup>     | 314.76 $\pm$ 5.04 <sup>de</sup>   | 231.36 $\pm$ 13.24 <sup>ef</sup>  | 60.05 $\pm$ 7.89 <sup>bc</sup>   |
|                             | #13 | 299.39 $\pm$ 22.41 <sup>d</sup>   | 134.55 $\pm$ 4.71 <sup>d</sup>     | 164.85 $\pm$ 15.04 <sup>bcd</sup>    | 294.76 $\pm$ 12.38 <sup>f</sup>   | 255.57 $\pm$ 10.47 <sup>e</sup>   | 64.34 $\pm$ 8.76 <sup>bc</sup>   |
|                             | #14 | 289.20 $\pm$ 9.33 <sup>d</sup>    | 122.64 $\pm$ 6.48 <sup>de</sup>    | 170.70 $\pm$ 16.33 <sup>bc</sup>     | 312.86 $\pm$ 1.65 <sup>ef</sup>   | 255.39 $\pm$ 20.24 <sup>de</sup>  | 62.73 $\pm$ 3.65 <sup>b</sup>    |
|                             | #15 | 256.28 $\pm$ 8.49 <sup>e</sup>    | 98.33 $\pm$ 6.30 <sup>ef</sup>     | 127.43 $\pm$ 29.07 <sup>efg</sup>    | 322.38 $\pm$ 3.81 <sup>d</sup>    | 224.80 $\pm$ 37.44 <sup>ef</sup>  | 47.36 $\pm$ 3.77 <sup>cd</sup>   |
|                             | #16 | 503.66 $\pm$ 84.40 <sup>ab</sup>  | 225.45 $\pm$ 42.73 <sup>ab</sup>   | 187.95 $\pm$ 1.78 <sup>b</sup>       | 326.19 $\pm$ 6.25 <sup>cd</sup>   | 400.79 $\pm$ 40.41 <sup>a</sup>   | 83.52 $\pm$ 2.14 <sup>a</sup>    |
|                             | #17 | 433.83 $\pm$ 45.24 <sup>abc</sup> | 212.45 $\pm$ 18.86 <sup>ab</sup>   | 192.34 $\pm$ 2.97 <sup>ab</sup>      | 321.43 $\pm$ 1.65 <sup>d</sup>    | 396.81 $\pm$ 17.00 <sup>a</sup>   | 61.89 $\pm$ 10.44 <sup>bc</sup>  |
|                             | #18 | 430.66 $\pm$ 6.95 <sup>ab</sup>   | 177.09 $\pm$ 4.30 <sup>ab</sup>    | 192.63 $\pm$ 3.04 <sup>ab</sup>      | 304.29 $\pm$ 9.18 <sup>ef</sup>   | 377.00 $\pm$ 10.72 <sup>a</sup>   | 64.52 $\pm$ 8.12 <sup>b</sup>    |
|                             | #19 | 431.21 $\pm$ 22.31 <sup>ab</sup>  | 196.23 $\pm$ 23.88 <sup>ab</sup>   | 185.91 $\pm$ 5.87 <sup>bc</sup>      | 329.05 $\pm$ 6.87 <sup>bcd</sup>  | 370.75 $\pm$ 19.23 <sup>ab</sup>  | 62.89 $\pm$ 6.01 <sup>bc</sup>   |
|                             | #20 | 284.24 $\pm$ 42.75 <sup>def</sup> | 129.30 $\pm$ 17.44 <sup>cd</sup>   | 185.03 $\pm$ 2.88 <sup>b</sup>       | 310.00 $\pm$ 1.65 <sup>e</sup>    | 322.29 $\pm$ 11.81 <sup>c</sup>   | 43.69 $\pm$ 6.51 <sup>cd</sup>   |
|                             | #21 | 357.93 $\pm$ 31.24 <sup>cd</sup>  | 148.14 $\pm$ 11.38 <sup>cd</sup>   | 190.88 $\pm$ 2.53 <sup>bc</sup>      | 328.10 $\pm$ 5.30 <sup>bcd</sup>  | 333.98 $\pm$ 13.06 <sup>bc</sup>  | 58.75 $\pm$ 9.32 <sup>bc</sup>   |
|                             | #22 | 370.06 $\pm$ 30.30 <sup>bc</sup>  | 150.20 $\pm$ 14.76 <sup>cd</sup>   | 182.98 $\pm$ 5.29 <sup>b</sup>       | 323.33 $\pm$ 5.79 <sup>cd</sup>   | 330.08 $\pm$ 14.83 <sup>bc</sup>  | 59.23 $\pm$ 9.18 <sup>bc</sup>   |
|                             | #23 | 429.01 $\pm$ 25.39 <sup>ab</sup>  | 218.29 $\pm$ 13.71 <sup>a</sup>    | 190.00 $\pm$ 1.83 <sup>bc</sup>      | 317.62 $\pm$ 10.73 <sup>cde</sup> | 402.57 $\pm$ 7.15 <sup>a</sup>    | 57.21 $\pm$ 6.37 <sup>bc</sup>   |
|                             | #24 | 305.87 $\pm$ 26.63 <sup>d</sup>   | 135.63 $\pm$ 24.21 <sup>cd</sup>   | 189.12 $\pm$ 2.21 <sup>bc</sup>      | 329.05 $\pm$ 5.04 <sup>cd</sup>   | 320.38 $\pm$ 24.26 <sup>c</sup>   | 54.36 $\pm$ 8.31 <sup>bcd</sup>  |
|                             | #25 | 447.74 $\pm$ 38.89 <sup>ab</sup>  | 183.31 $\pm$ 10.51 <sup>b</sup>    | 196.73 $\pm$ 0.77 <sup>a</sup>       | 325.24 $\pm$ 4.15 <sup>cd</sup>   | 373.19 $\pm$ 8.46 <sup>ab</sup>   | 60.86 $\pm$ 8.23 <sup>bc</sup>   |

TEAC: TroloxC equivalent antioxidant capacity; ABTS: 2,2-azinobis (3-ethylbenzthiazoline-6-sulphonic acid; DPPH: 2,2-diphenyl-1-picrylhydrazyl; FRAP: ferric reducing antioxidant power; CUPRAC: cupric reducing antioxidant capacity; ORAC: oxygen radical absorbance capacity; CAA: cellular antioxidant assay. Different superscript letters indicate significant differences at  $p < 0.05$ .

**Table S3.** Pearson correlation coefficient linking phytochemicals and antioxidant activity of ethanolic extracts of different populations of two *Monochoria* species (6 populations of *M. hastata* and 25 populations of *M. angustifolia*) covering the entire floristic regions from Thailand.

|        | (1)       | (2)      | (3)      | (4)      | (5)      | TPC      | TFC      | FRAP     | CUPRAC   | ABTS     | DPPH  | ORAC    |
|--------|-----------|----------|----------|----------|----------|----------|----------|----------|----------|----------|-------|---------|
| (1)    |           |          |          |          |          |          |          |          |          |          |       |         |
| (2)    | -0.101    |          |          |          |          |          |          |          |          |          |       |         |
| (3)    | 0.0176    | 0.992*** |          |          |          |          |          |          |          |          |       |         |
| (4)    | -0.0502   | 0.998*** | 0.998*** |          |          |          |          |          |          |          |       |         |
| (5)    | 0.806 *** | 0.507*   | 0.606*   | 0.551**  |          |          |          |          |          |          |       |         |
| TPC    | 0.686 *** | 0.141    | 0.218    | 0.174*** | 0.673    |          |          |          |          |          |       |         |
| TFC    | 0.0812    | 0.983*** | 0.998*** | 0.991*** | 0.656    | 0.259    |          |          |          |          |       |         |
| FRAP   | 0.030     | 0.968*** | 0.977*** | 0.974*** | 0.603    | 0.262    | 0.976    |          |          |          |       |         |
| CUPRAC | 0.467*    | 0.750    | 0.811*** | 0.780*** | 0.850*** | 0.656*** | 0.836    | 0.844    |          |          |       |         |
| ABTS   | 0.601***  | 0.290    | 0.364*   | 0.320*** | 0.691*** | 0.642*   | 0.398*   | 0.425*** | 0.681    |          |       |         |
| DPPH   | 0.690***  | -0.407*  | -0.317*  | -0.364   | 0.360*   | 0.228    | -0.275   | -0.317   | 0.0631   | 0.157    |       |         |
| ORAC   | 0.564***  | 0.600*** | 0.673*** | 0.633*** | 0.846*** | 0.660*** | 0.704*** | 0.731*** | 0.938*** | 0.855*** | 0.162 |         |
| CAA    | 0,052     | 0,820*** | 0,833*** | 0,828*** | 0,533**  | 0,376    | 0,233*** | 0,830*** | 0,756*** | 0,648    | 0,331 | -0,352* |

\*\*\* significant  $p < 0.001$ ; \*\* significant  $p < 0.01$ ; \* significant  $p < 0.05$ ; (1) apigenin-7-*O*-rutinoside ; (2) luteolin-7-*O*-glucoside ; (3) apigenin-7-*O*-glucoside (aka apigetrin) ; (4) luteolin ; (5) apigenin ; TPC: total phenolic content; TFC: total flavonoid content; FRAP: *in vitro* antioxidant FRAP assay; CUPRAC: *in vitro* antioxidant CUPRAC assay; ABTS: *in vitro* antioxidant ABTS assay; DPPH: *in vitro* antioxidant ABTS assay; ORAC: *in vitro* antioxidant ORAC assay; CAA: cellular antioxidant assay.

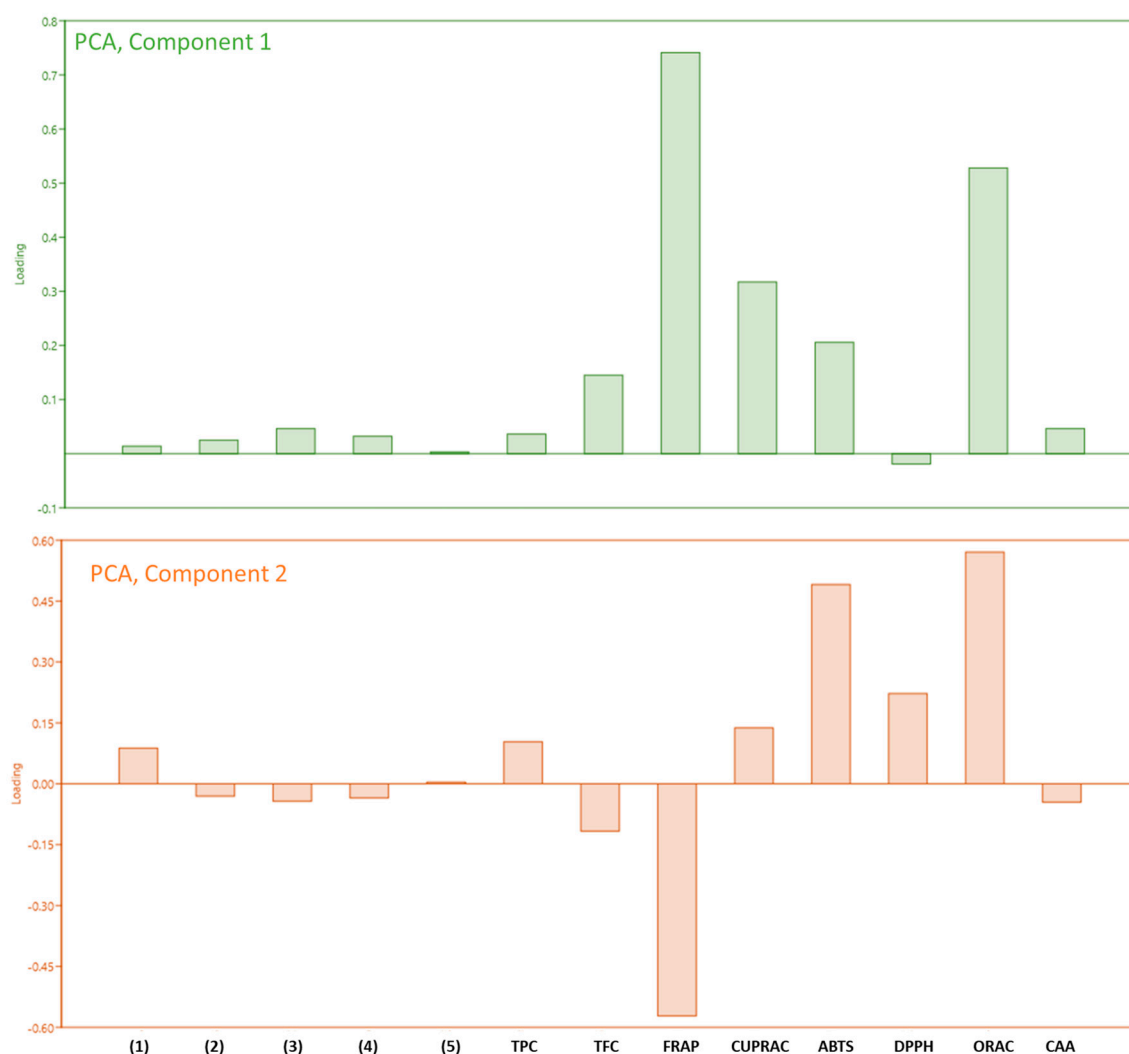

**Figure S1.** Loading scores of the component 1 and component 2 of the PCA (presented in Figure 5) linking the phytochemical profile and antioxidant capacity of the extracts of *M. hastata* and *M. angustifolia* populations originating from various floristic regions from Thailand. 1. apigenin-7-*O*-rutinoside; 2. luteolin-7-*O*-glucoside; 3. apigenin-7-*O*-glucoside (aka apigetrin); 4. Luteolin; 5. Apigenin; TPC: total phenolic content; TFC: total flavonoid content; ABTS: 2,2-azinobis (3-ethylbenzthiazoline-6-sulphonic acid; DPPH: 2,2-diphenyl-1-picrylhydrazyl; FRAP: ferric reducing antioxidant power; CUPRAC: cupric reducing antioxidant capacity; ORAC: oxygen radical absorbance capacity; CAA: cellular antioxidant assay.
